# Supplementary material for: Family-wide evaluation of RAPID ALKALINIZATION FACTOR peptides
Source: PubMed Central journal article supplement — Plant Physiol. 2021 Jul 20;187(2):996–1010. doi: 10.1093/plphys/kiab308 (PMC8491022; doi:10.1093/plphys/kiab308), 2021-07-20
Supplement: kiab308_supplementary_data.pdf [file kiab308_supplementary_data.pdf]

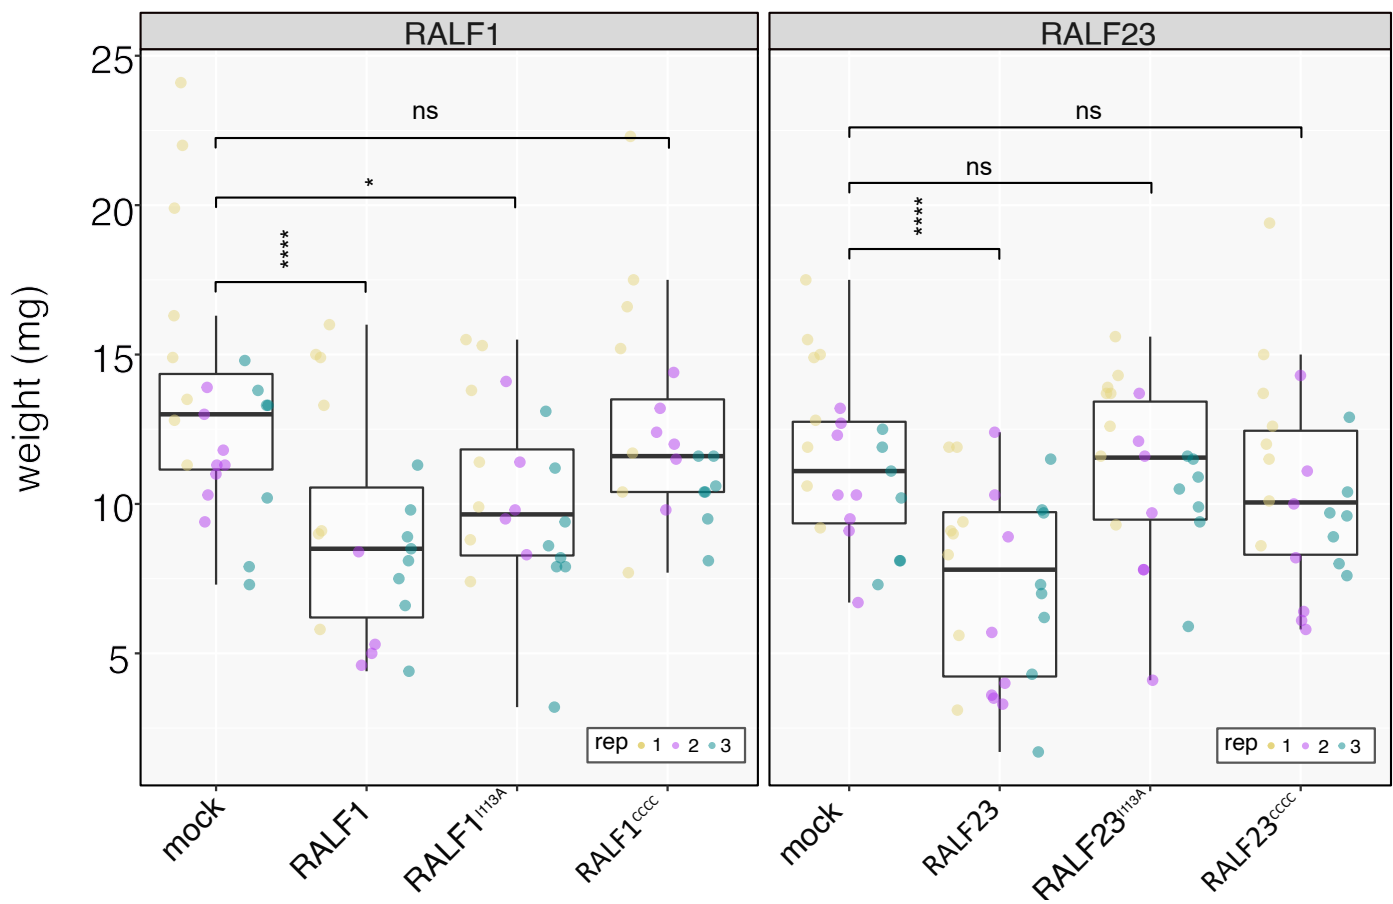

**Supplemental Figure S1. YISY motif and conserved cysteine residues are important for *At*RALF bioactivity.** Fresh weight of 12-day-old seedlings grown in the absence (mock) or presence of 10  $\mu$ M RALF peptides ( $n=8$ ). Data from three independent repetitions are shown (colours indicate different replicates). Upper and lower whiskers represent 1.5 times and  $-1.5$  times interquartile range; upper and lower hinges represent 25 % and 75 % quartiles; middle represents median or 50 % quartile. Asterisks indicate significance levels of a one-way ANOVA followed by a Dunnett test comparing each treatment to the mock treatment: ns (p-value >0.05), \* (p-value  $\leq$  0.05) and \*\*\*\* (p-value  $\leq$  0.0001).

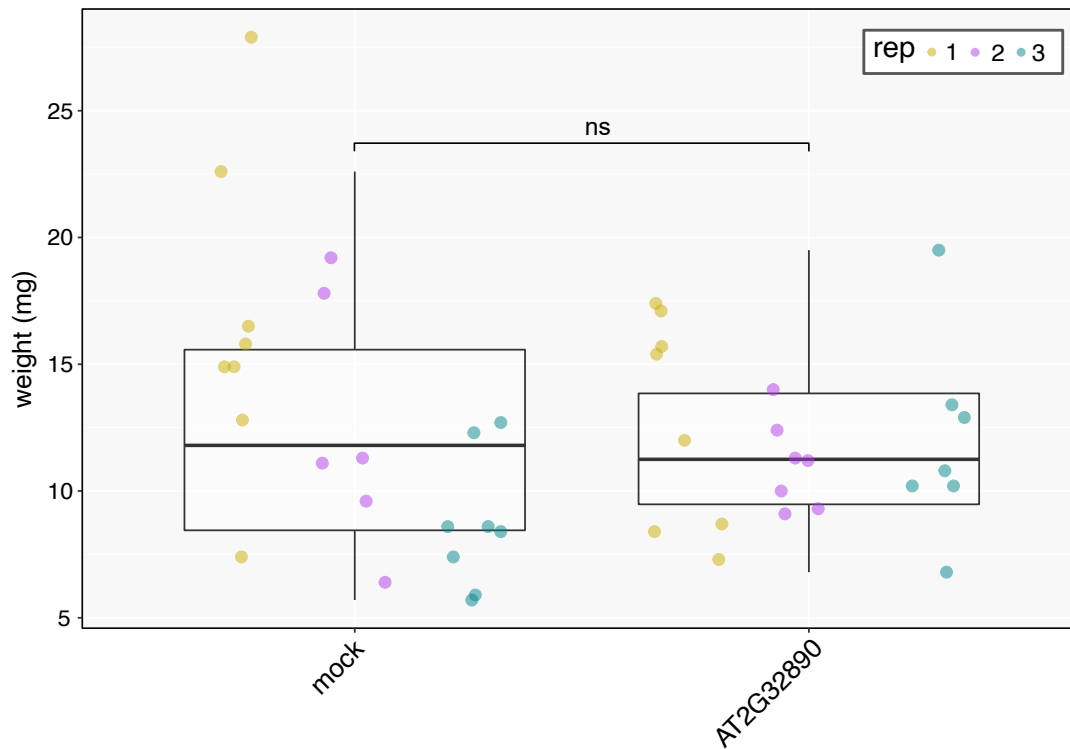

**Supplemental Figure S2. Fresh weight of 12-day-old seedlings grown in the absence (mock) or presence of 10  $\mu$ M AT2G32890 peptide (n=8).** Data from three independent repetitions are shown (colours indicate different replicates). Upper and lower whiskers represent 1.5 times and -1.5 times interquartile range; upper and lower hinges represent 25 % and 75 % quartiles; middle represents median or 50 % quartile. Asterisks indicate significance levels of a Kruskal-Wallis' multiple comparison test; each treatment was compared to their corresponding mock treatment: ns (p-value > 0.05).

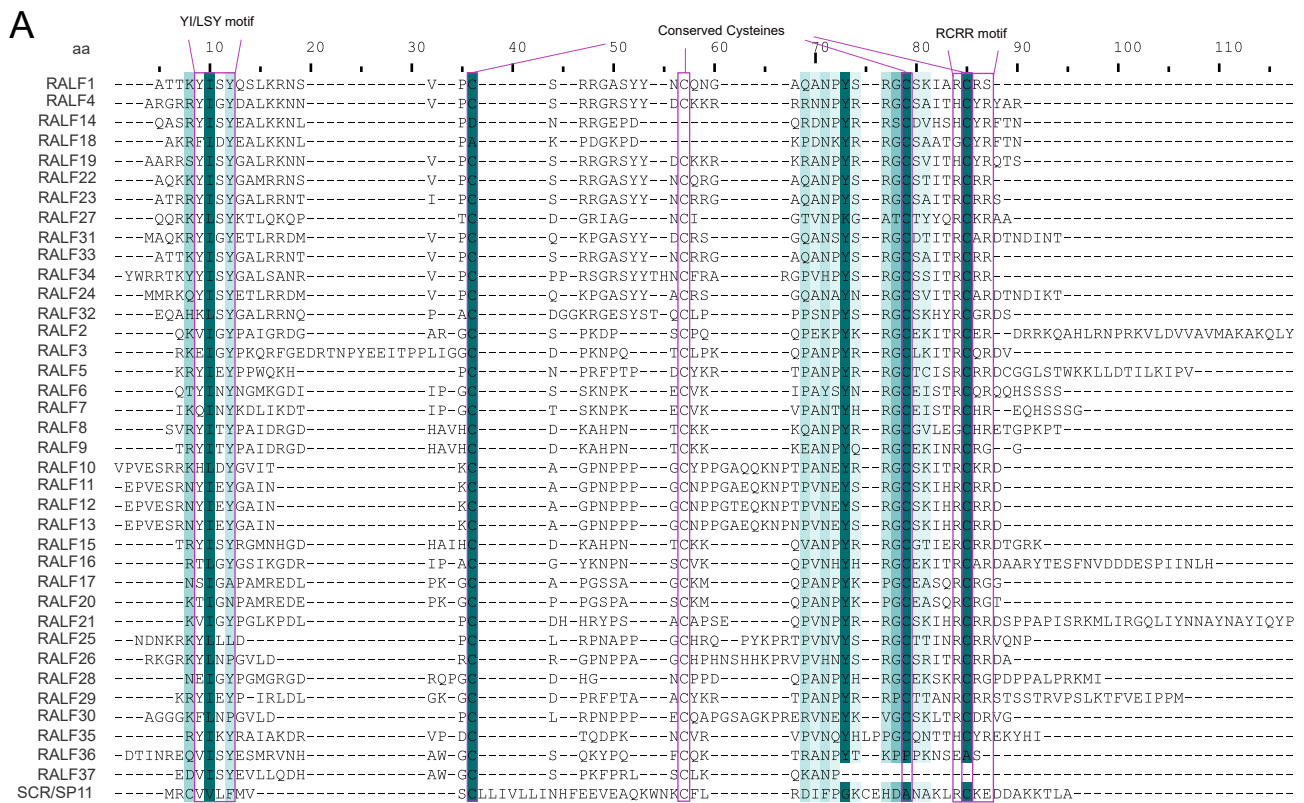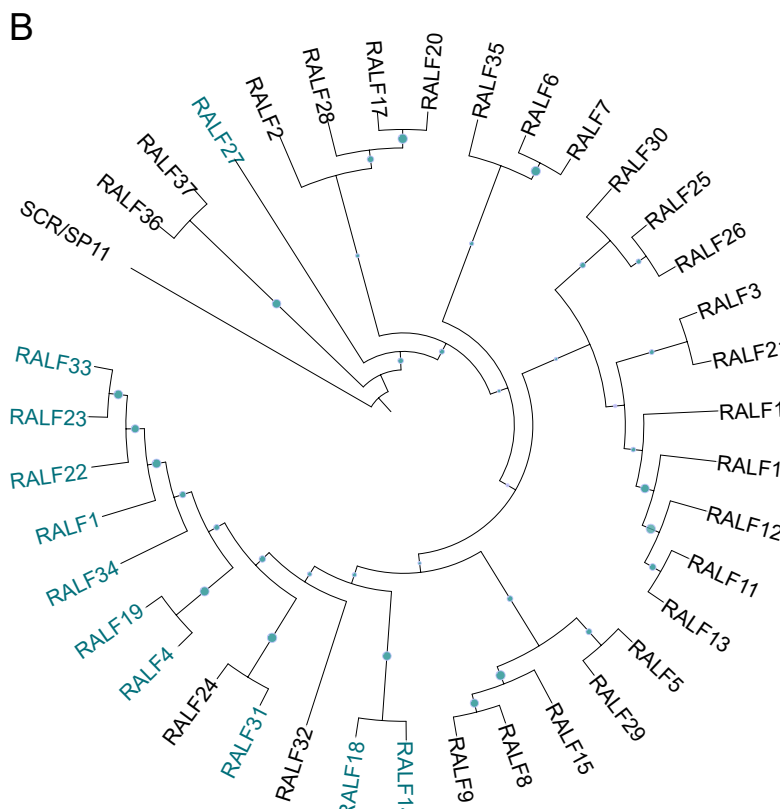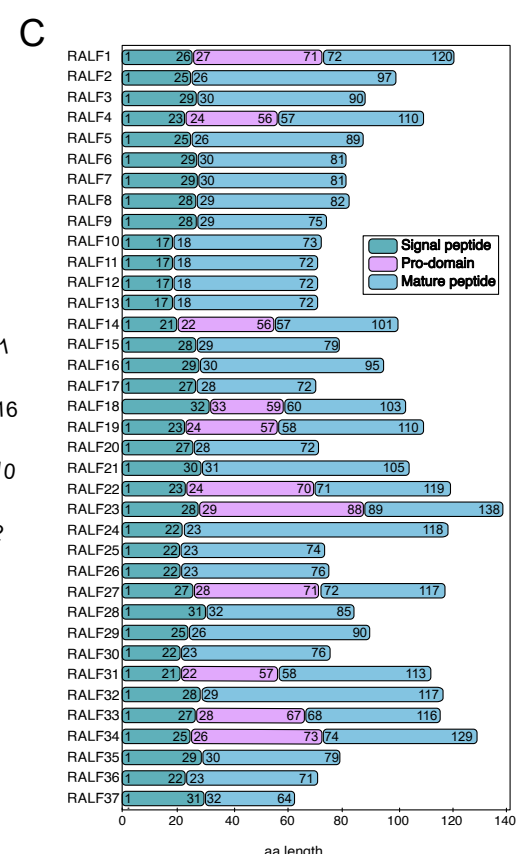

**Supplemental Figure S3. Phylogenetic relationship of our proposed revised consensus list of AtRALF.** (A) Alignment of the C-terminal part of consensus AtRALF peptides. Colour-code based on sequence conservation. The darker the colour, the more conserved the residue. Pink boxes indicate conserved motifs. (B) Phylogenetic rooted tree of the AtRALF peptides. UPGMA tree inferred from the MUSCLE alignment displayed in (A) S-locus protein 11 or S-locus Cys-rich (SCR/SP11) sequence was used to root the tree. RALFs highlighted in teal indicated those predicted to be cleaved by the protease S1P. Bootstrap values (1000 repetitions) above 50 % are represented by green circles in the corresponding branches. The higher the bootstrap value for a particular branch, the higher the size of the circle (C) Schematic representation of *A. thaliana* PRORALFs domains. RALF peptides are expressed as protein precursors that require further processing steps. They contain an N-terminal SP (in green), variable pro domain for those that are predicted to be cleaved (pink) and a mature C-terminal part (blue).

A

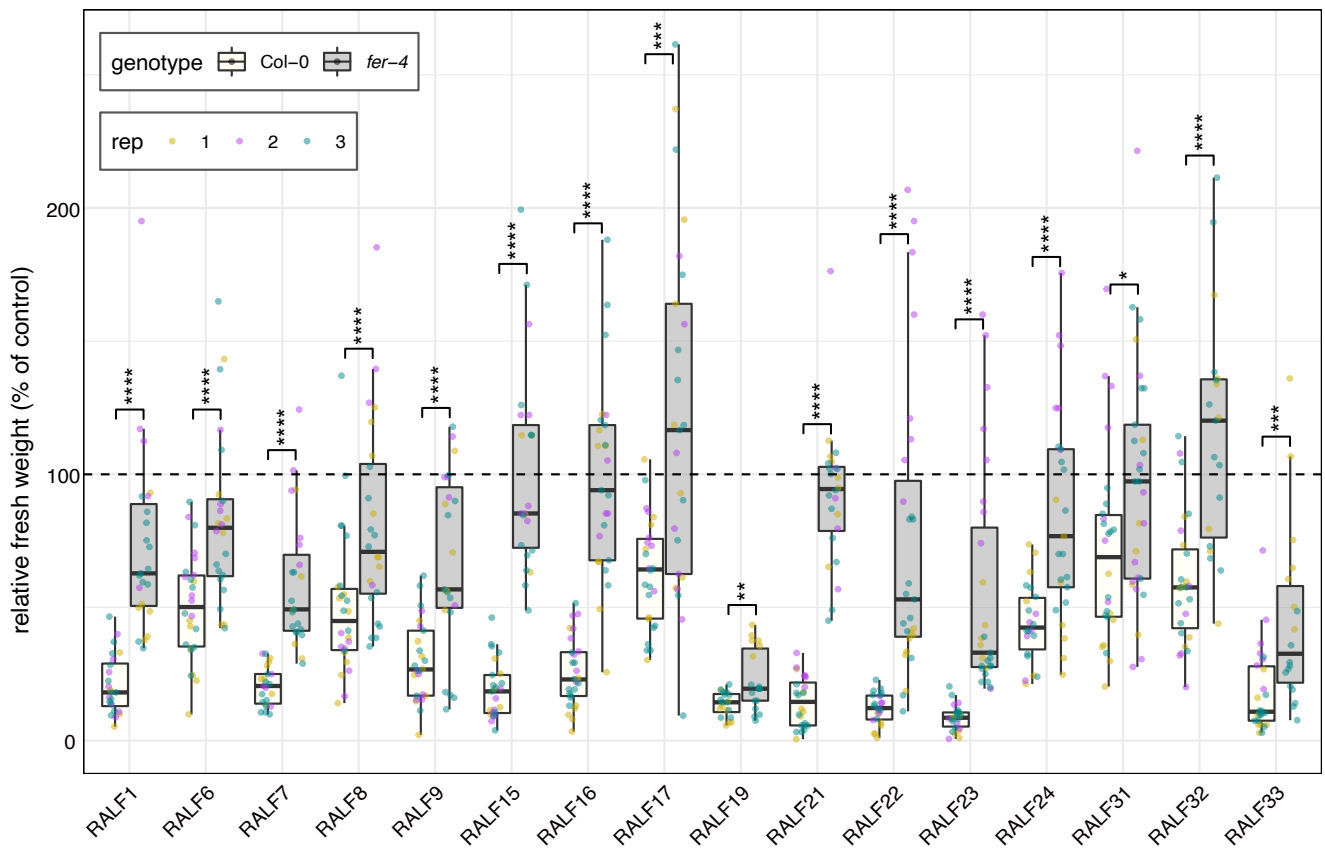

B

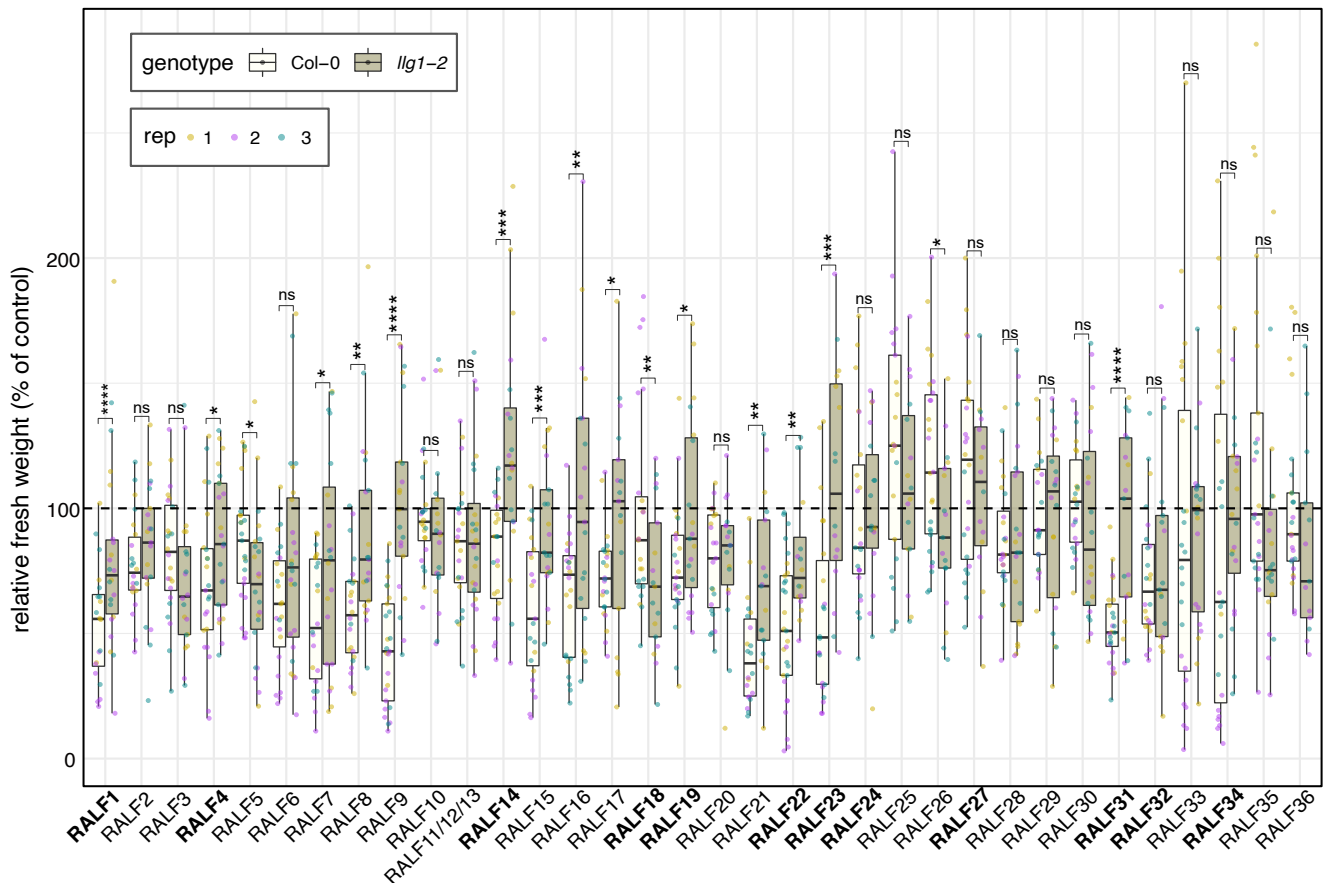

**Supplemental Figure S4. FER-dependency of AtRALF peptides in inducing seedling growth inhibition at 10  $\mu$ M.** (A) Fresh weight of 12-day-old seedlings grown in the presence of 10  $\mu$ M RALF peptides relative to mock. RALF peptides that were active at 1  $\mu$ M in seedling growth inhibition assays in Col-0 and FER-dependent were used. Mock treatment of Col-0 (white) and *fer-4* (grey) correspond to 100 % in the y axis. (B) Fresh weight of 12-day-old seedlings grown in the presence of 2  $\mu$ M RALF peptides relative to mock treatment. Mock-treated seedlings weight of Col-0 (white) and *Ilg1-2* (green) correspond to 100 % in the y axis. RALF peptides indicated in bold correspond to predicted LLG1- dependent RALFs. A and B, Data from three independent repetitions are shown (colours indicate different replicates). Upper and lower whiskers represent 1.5 times and -1.5 times interquartile range; upper and lower hinges represent 25 % and 75 % quartiles; middle represents median or 50 % quartile. Asterisks indicate significance levels of a two-tailed T-test comparing each treatment in *fer-4* or *Ilg1-2* to the corresponding treatment in Col-0: ns (p-value >0.05), \* (p-value  $\leq$  0.05), \*\* (p-value  $\leq$  0.01), \*\*\* (p-value  $\leq$  0.001) and \*\*\*\* (p-value  $\leq$  0.0001).

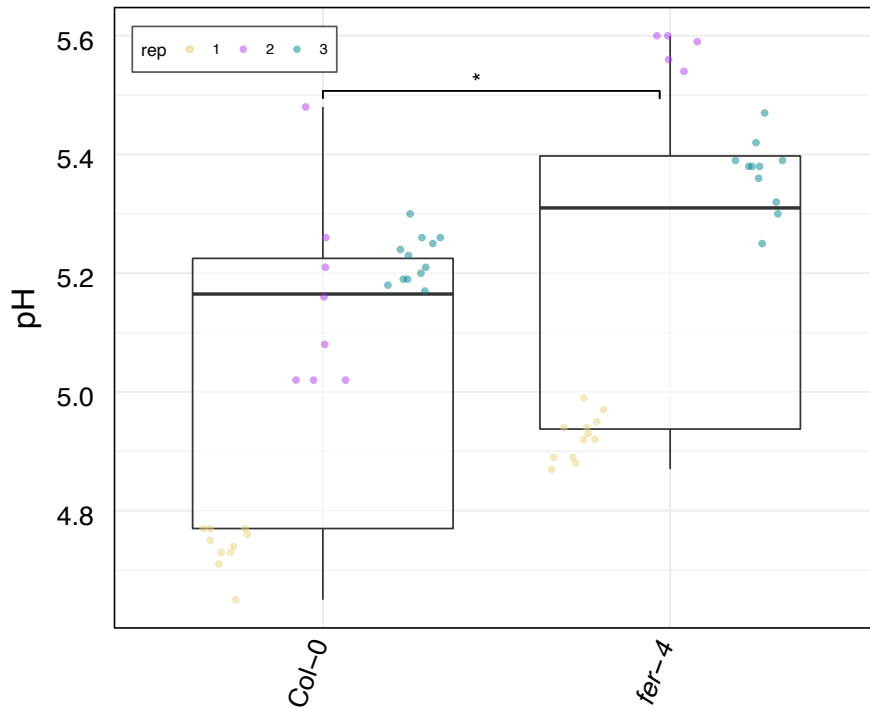

**Supplemental Figure S5. *fer-4* bathing medium is more alkaline than Col-0 medium.** pH values of 7-day-old Col-0 and *fer-4* seedlings recorded 4 hours after transferring seedlings into liquid MS with no treatment

(mock). Data from three independent repetitions are shown (colours indicate different replicates). Asterisk indicates significance levels of a two-tailed t-test: \* ( $p$ -value  $\leq 0.05$ ). Upper and lower whiskers represent 1.5 times and -1.5 times interquartile range; upper and lower hinges represent 25 % and 75 % quartiles; middle represents median or 50 % quartile.

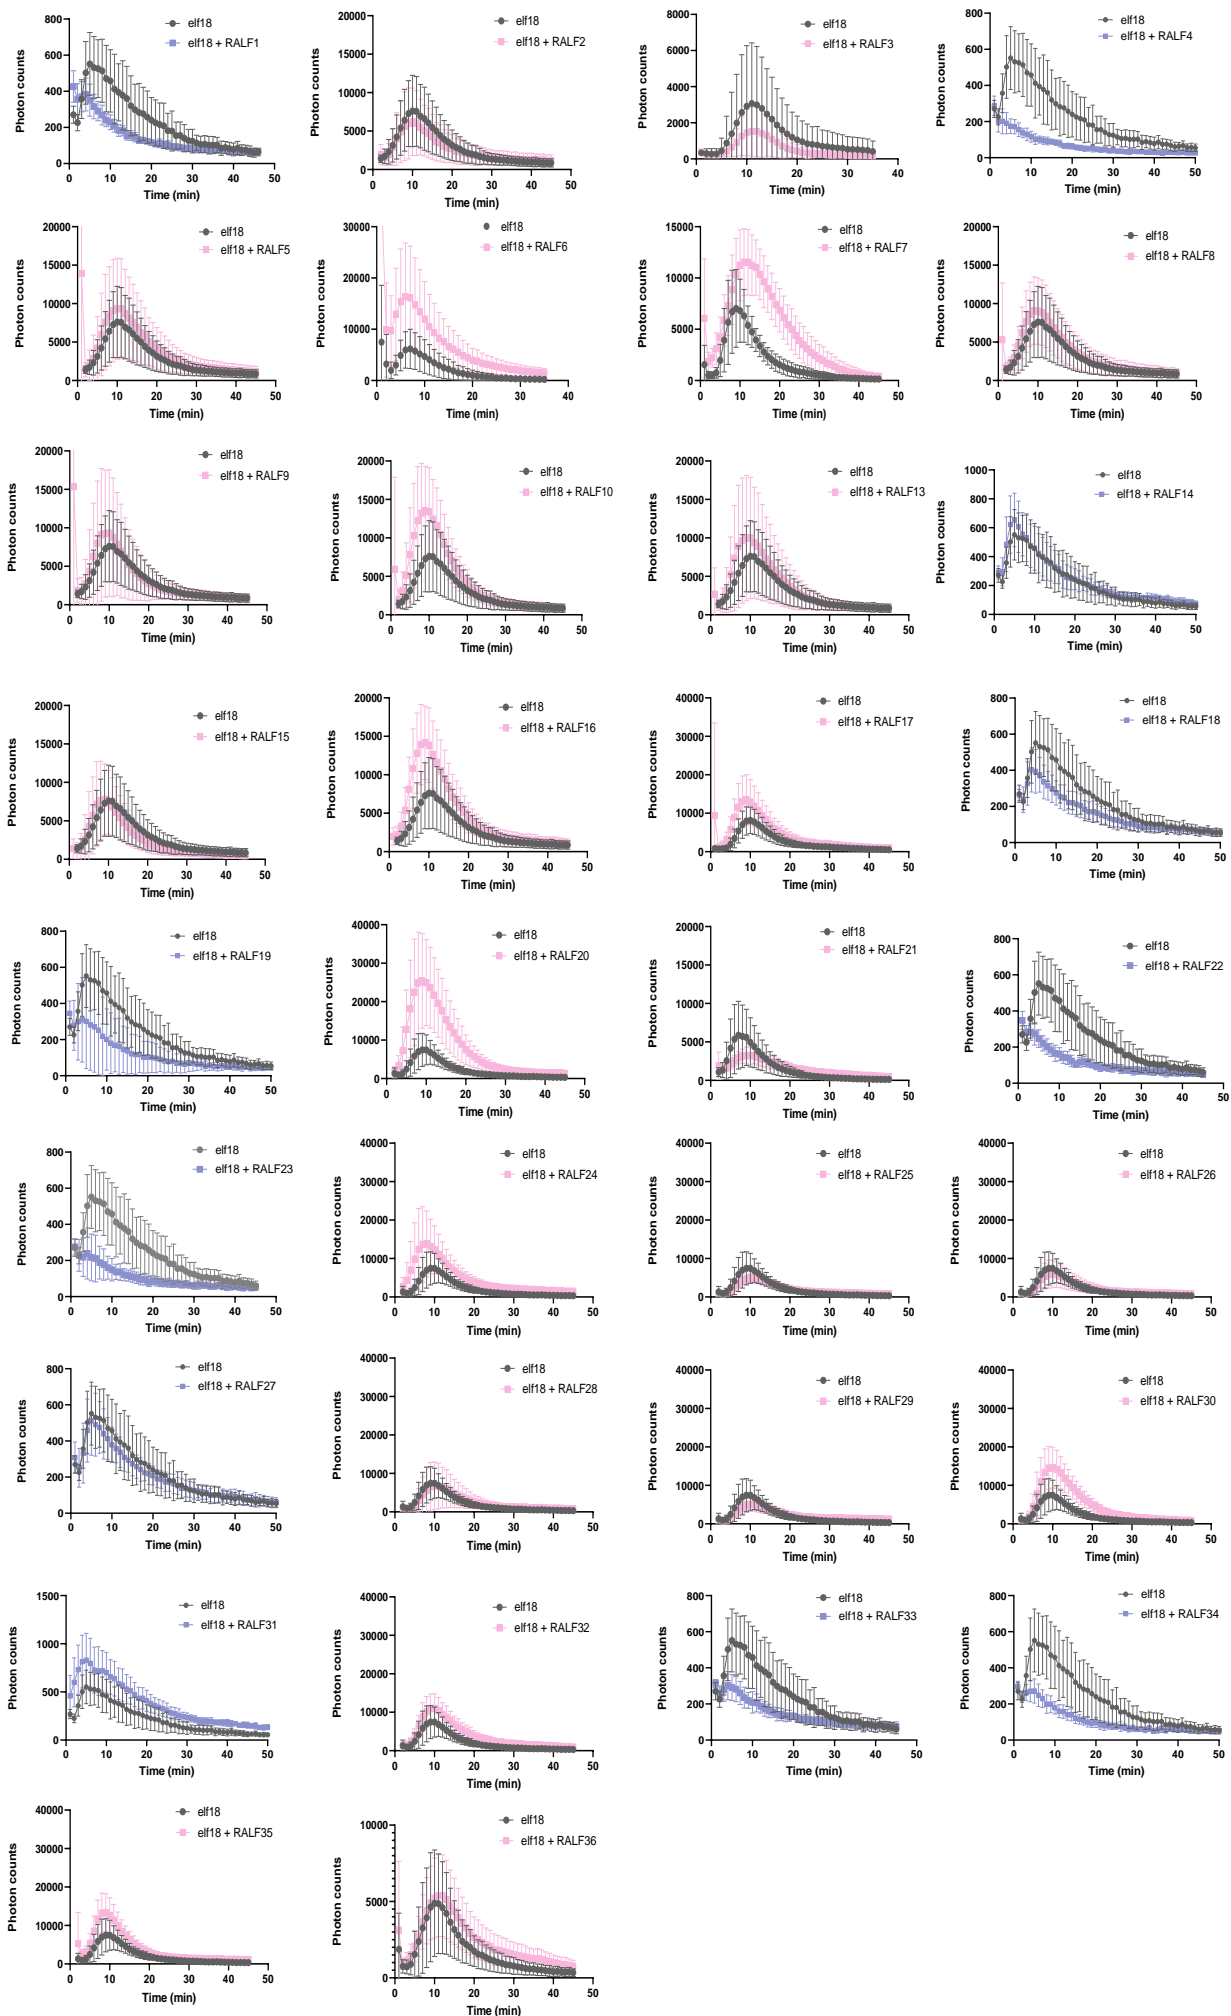

**Supplemental Figure S6. Effect of *At*RALF peptides on elf18-induced ROS production.** ROS production in Col-0 leaf discs co-treated with 100 nM elf18 and 1  $\mu$ M RALF peptides or elf18 alone as control. Shown are the kinetics of one representative replicate. Predicted S1P-cleaved RALF peptides are indicated in blue and non-cleaved in pink.

A

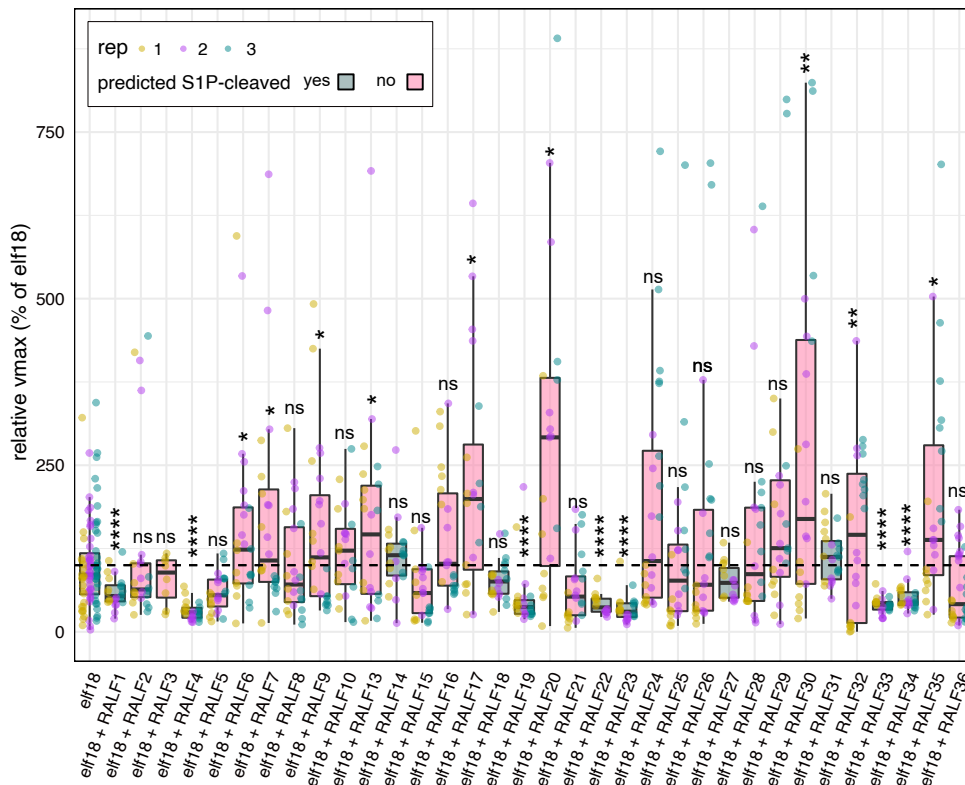

B

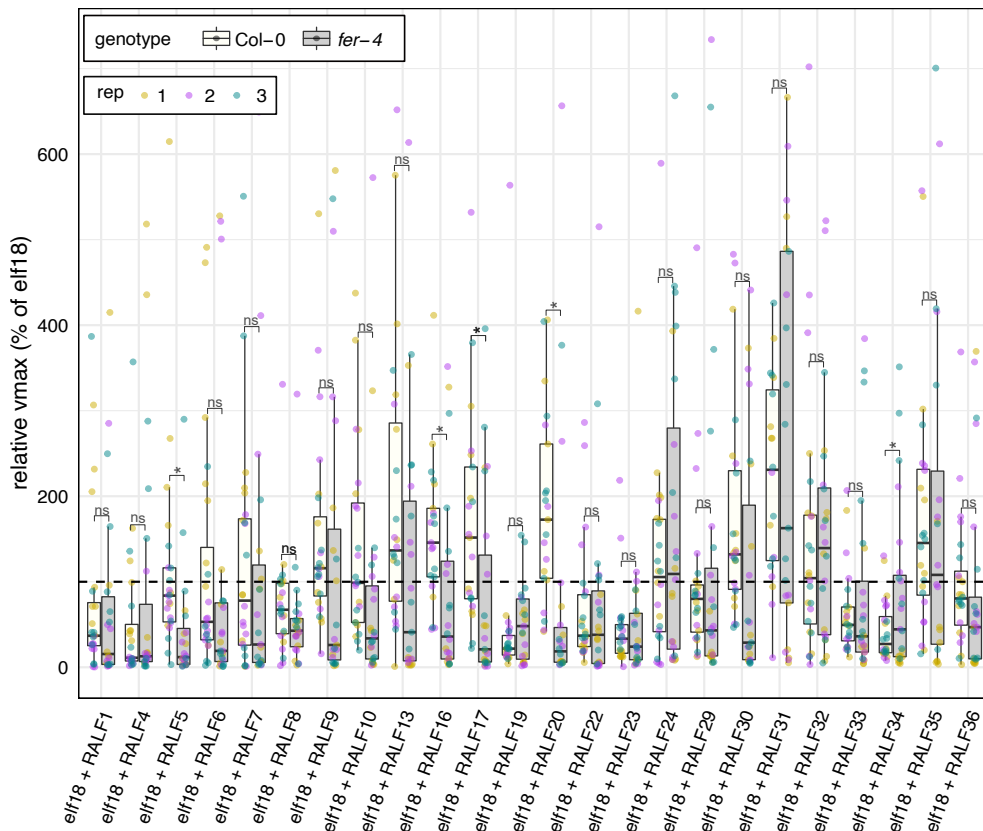

**Supplemental Figure S7. Effect of AtRALF peptides on ROS production.** (A) ROS production in Col-0 leaf discs co-treated with 100 nM elf18 and 1  $\mu$ M RALF peptides. In blue, box-plots of predicted S1P-cleaved RALF peptides and in pink, box-plots of non-cleaved RALF peptides. Asterisks indicate significance levels of a one-way ANOVA followed by a Dunnet test comparing each treatment to elf18 (B) ROS production in Col-0 and *fer-4* leaf discs co-treated with 100 nM elf18 and 1  $\mu$ M RALF peptides. Col-0 data are shown in white and *fer-4* data in grey. Asterisks indicate significance levels of a two-tailed T-test comparing each treatment in *fer-4* to the corresponding in Col-0. A and B, Maximal velocity ( $v_{max}$ ) values of the ROS curves relative to elf18 data are shown,  $n = 8$ . elf18 ROS data correspond to 100 % (dashed lines) in the y axis. Upper and lower whiskers represent 1.5 times and  $-1.5$  times interquartile range; upper and lower hinges represent 25 % and 75 % quartiles; middle represents median or 50 % quartile. Data from three independent repetitions are shown (colours indicate different replicates). Asterisk significance: ns ( $p$ -value  $>0.05$ ), \*\* ( $p$ -value  $\leq 0.01$ ), \*\*\* ( $p$ -value  $\leq 0.001$ ) and \*\*\*\* ( $p$ -value  $\leq 0.0001$ ).

A

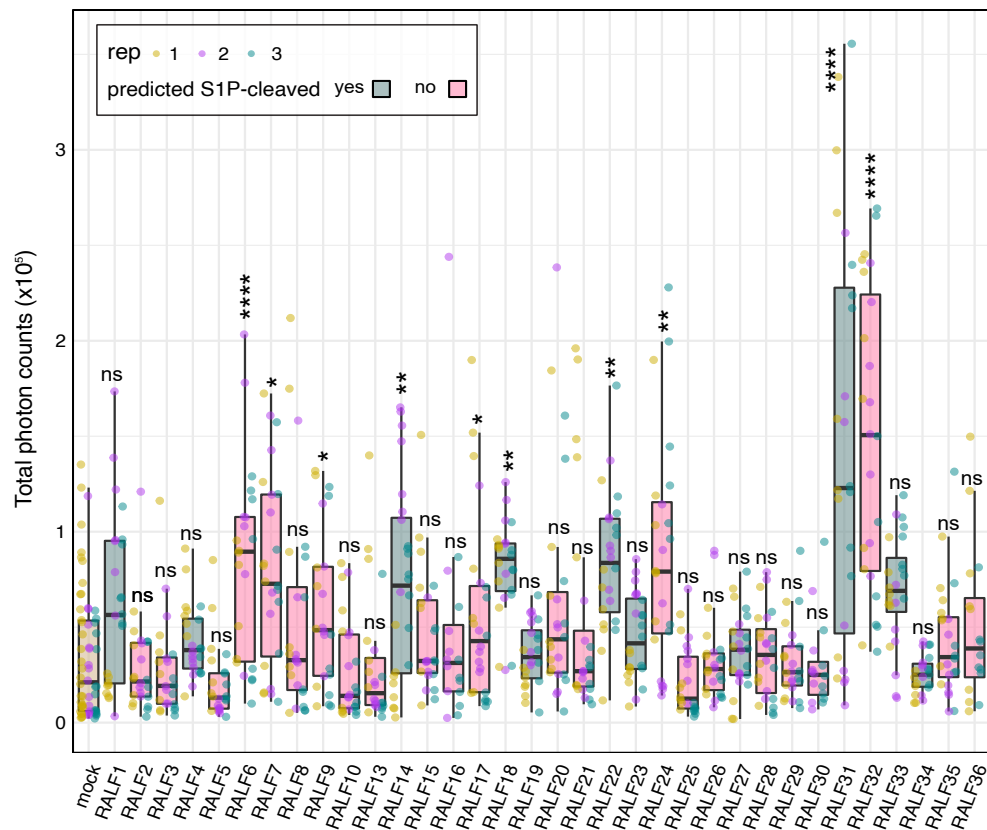

B

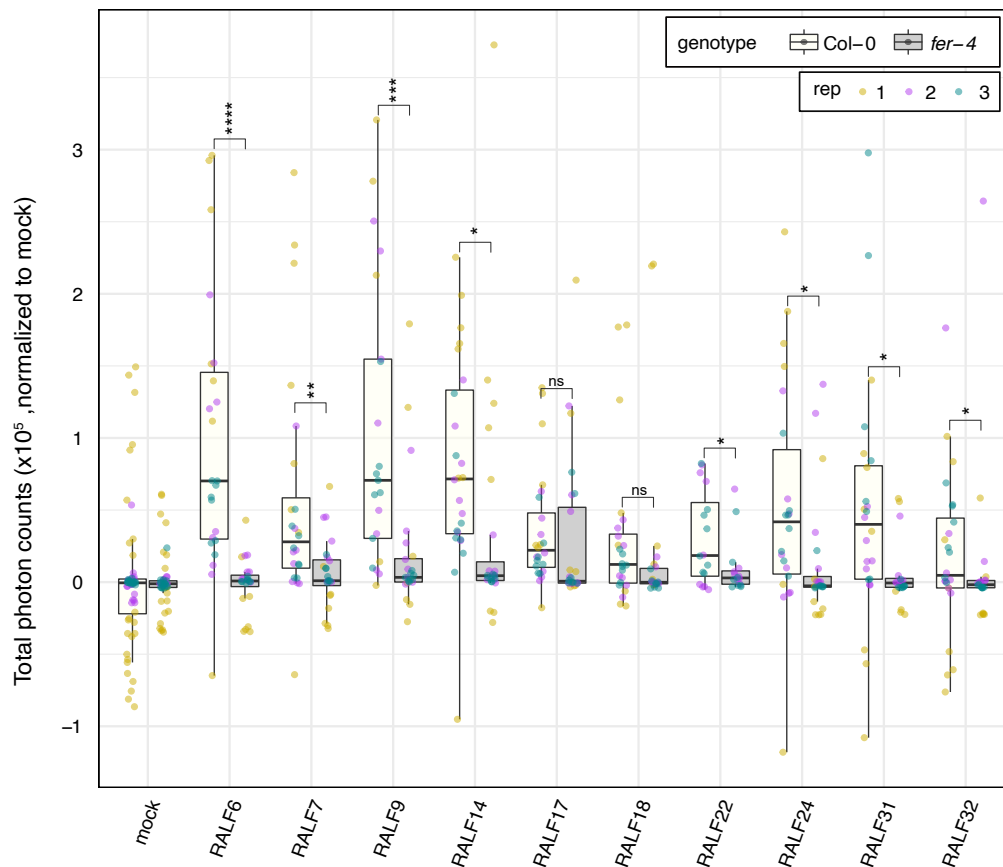

**Supplemental Figure S8. Effect of *At*RALF peptides on ROS production in *Col-0* and *fer-4*.** (A) ROS production in *Col-0* leaf discs treated with 1  $\mu$ M RALF peptides. In blue, box-plots of predicted S1P-cleaved RALF peptides and in pink, box plots of non-cleaved RALF peptides. Asterisks indicate significance levels of a one-way ANOVA followed by a Dunnett test comparing each treatment to mock. Integration as mean values of total photon counts over 45 min  $\pm$  SE,  $n = 8$ . (B) ROS production in *Col-0* and *fer-4* leaf discs treated with 1  $\mu$ M RALF peptides ( $n=8$ ). *Col-0* data are shown in white and *fer-4* data in grey. Asterisks indicate significance levels of a two-tailed T-test comparing each treatment in *fer-4* to the corresponding in *Col-0*. A and B, values are means of total photon counts over 45 min relative to mock data. Data from three independent repetitions are shown (colours indicate different replicates). Upper and lower whiskers represent 1.5 times and  $-1.5$  times interquartile range; upper and lower hinges represent 25 % and 75 % quartiles; middle represents median or 50 % quartile. Asterisk significance: ns ( $p$ -value  $>0.05$ ), \*\* ( $p$ -value  $\leq 0.01$ ), \*\*\* ( $p$ -value  $\leq 0.001$ ) and \*\*\*\* ( $p$ -value  $\leq 0.0001$ ).



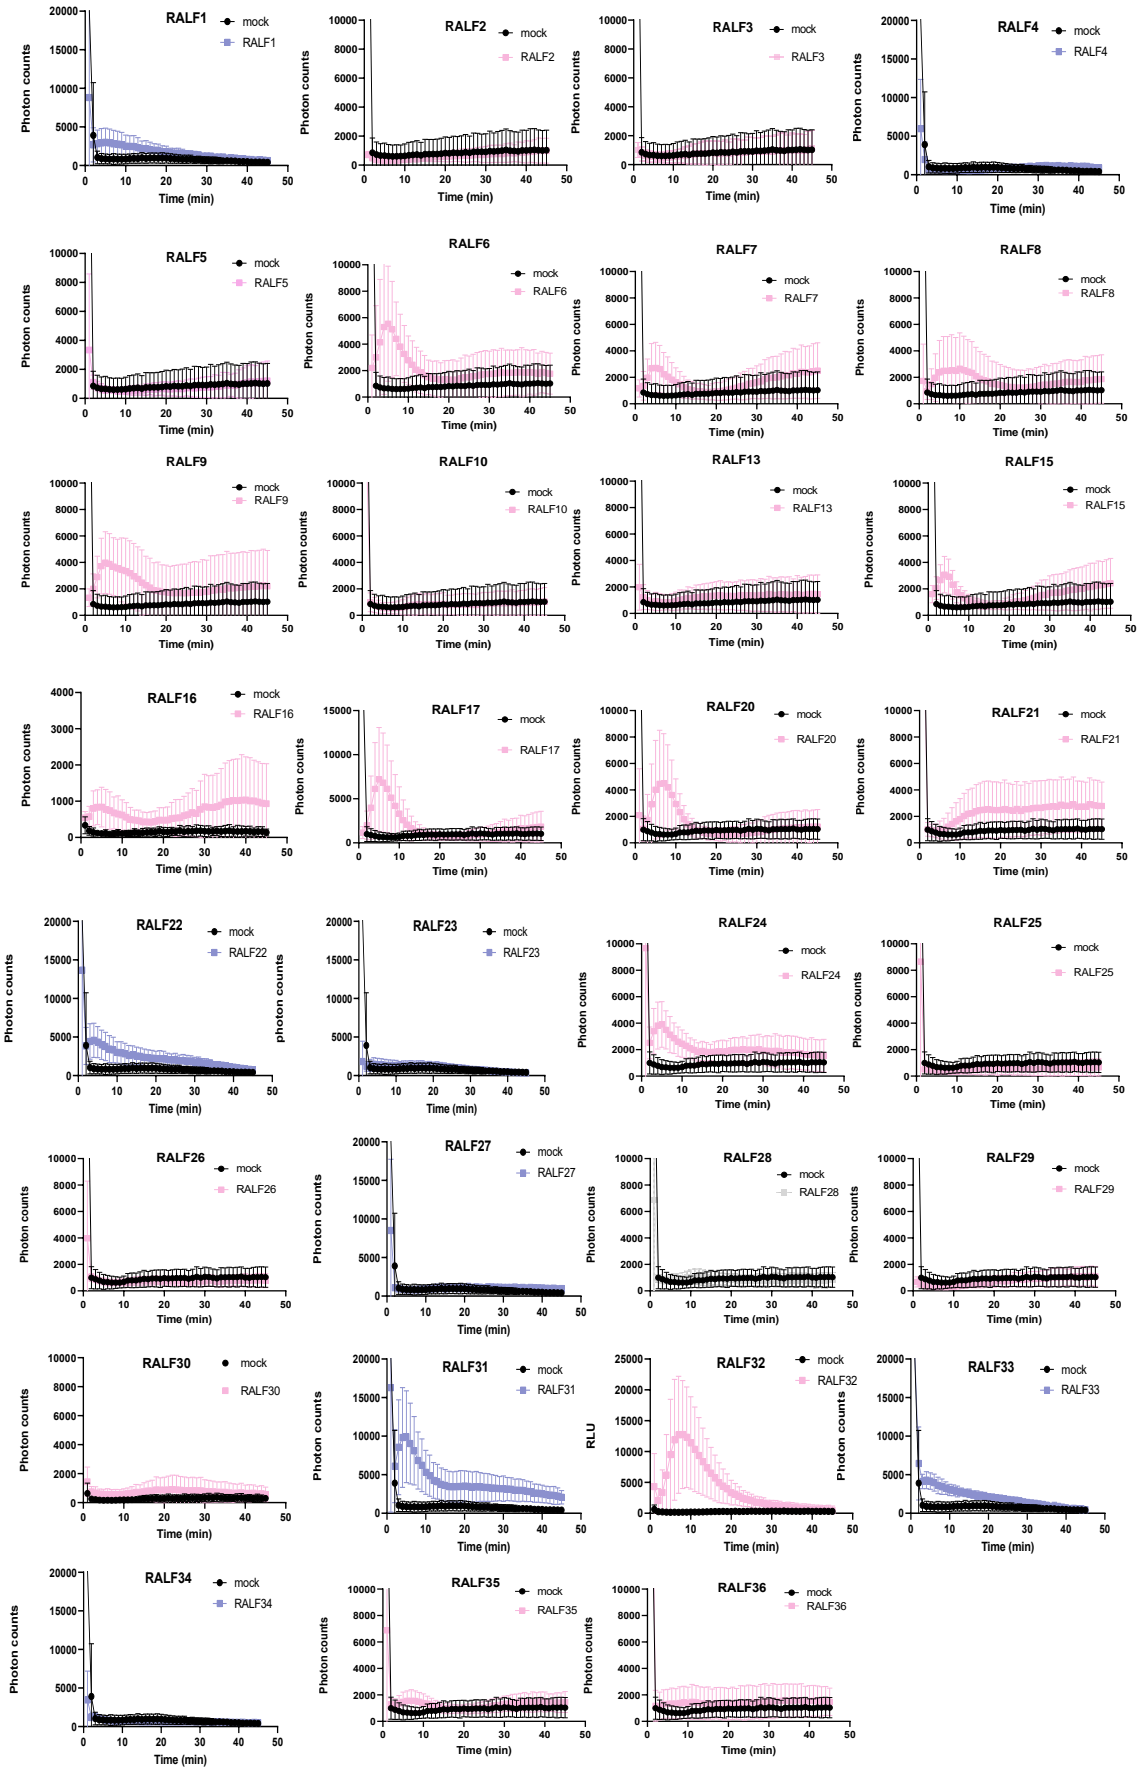

**Supplemental Figure S9. Effect of AtRALF peptides on ROS production.** ROS production in Col-0 leaf discs treated with 1 μM RALF peptides. Shown are the kinetics of one representative replicate. Predicted S1P-cleaved RALF peptides are indicated in blue and non-cleaved in pink.

A

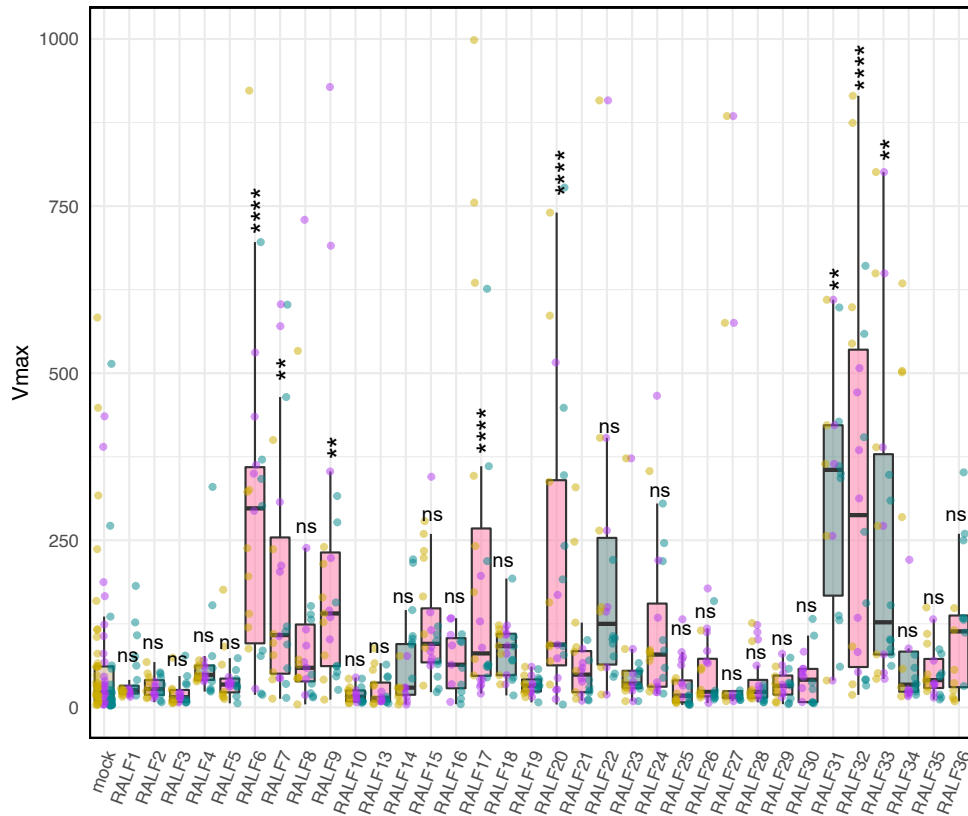

B

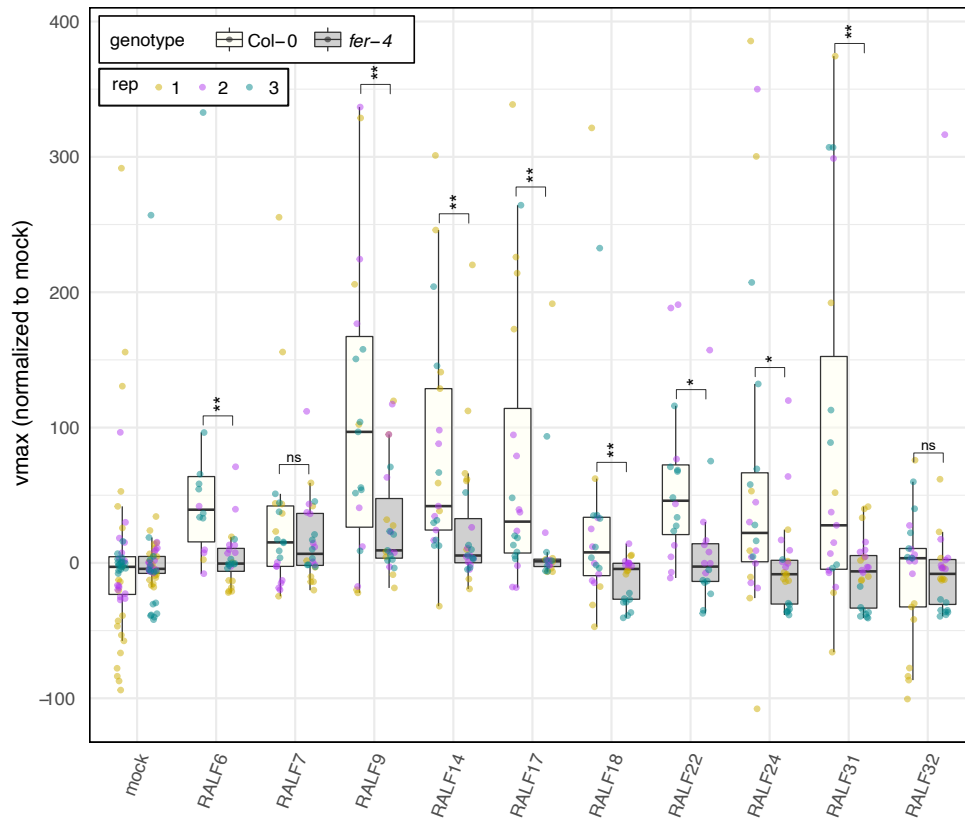

### Supplemental Figure S10. Effect of predicted AtRALF peptides on ROS production in Col-0 and *fer-4*.

(A) ROS production in Col-0 leaf discs treated with 1  $\mu$ M RALF peptides. In blue, box-plots of predicted S1P-cleaved RALF peptides and in pink, box plots of non-cleaved RALF peptides. Maximal velocity values of the ROS curves are shown,  $n = 8$ . Asterisks indicate significance levels of a one-way ANOVA followed by a Dunnett test comparing each treatment to mock. (B) ROS production in Col-0 and *fer-4* leaf discs treated with 1  $\mu$ M RALF peptides ( $n=8$ ). Col-0 data are shown in white and *fer-4* data in grey. Maximal velocity values of the ROS curves relative to mock data are shown,  $n = 8$ . Asterisks indicate significance levels of a two-tailed T-test comparing each treatment in *fer-4* to the corresponding in Col-0. A and B, Data from three independent repetitions are shown (colours indicate different replicates). Upper and lower whiskers represent 1.5 times and  $-1.5$  times interquartile range; upper and lower hinges represent 25 % and 75 % quartiles; middle represents median or 50 % quartile. Asterisk significance: ns (p-value  $>0.05$ ), \*\* (p-value  $\leq 0.01$ ), \*\*\* (p-value  $\leq 0.001$ ) and \*\*\*\* (p-value  $\leq 0.0001$ ).

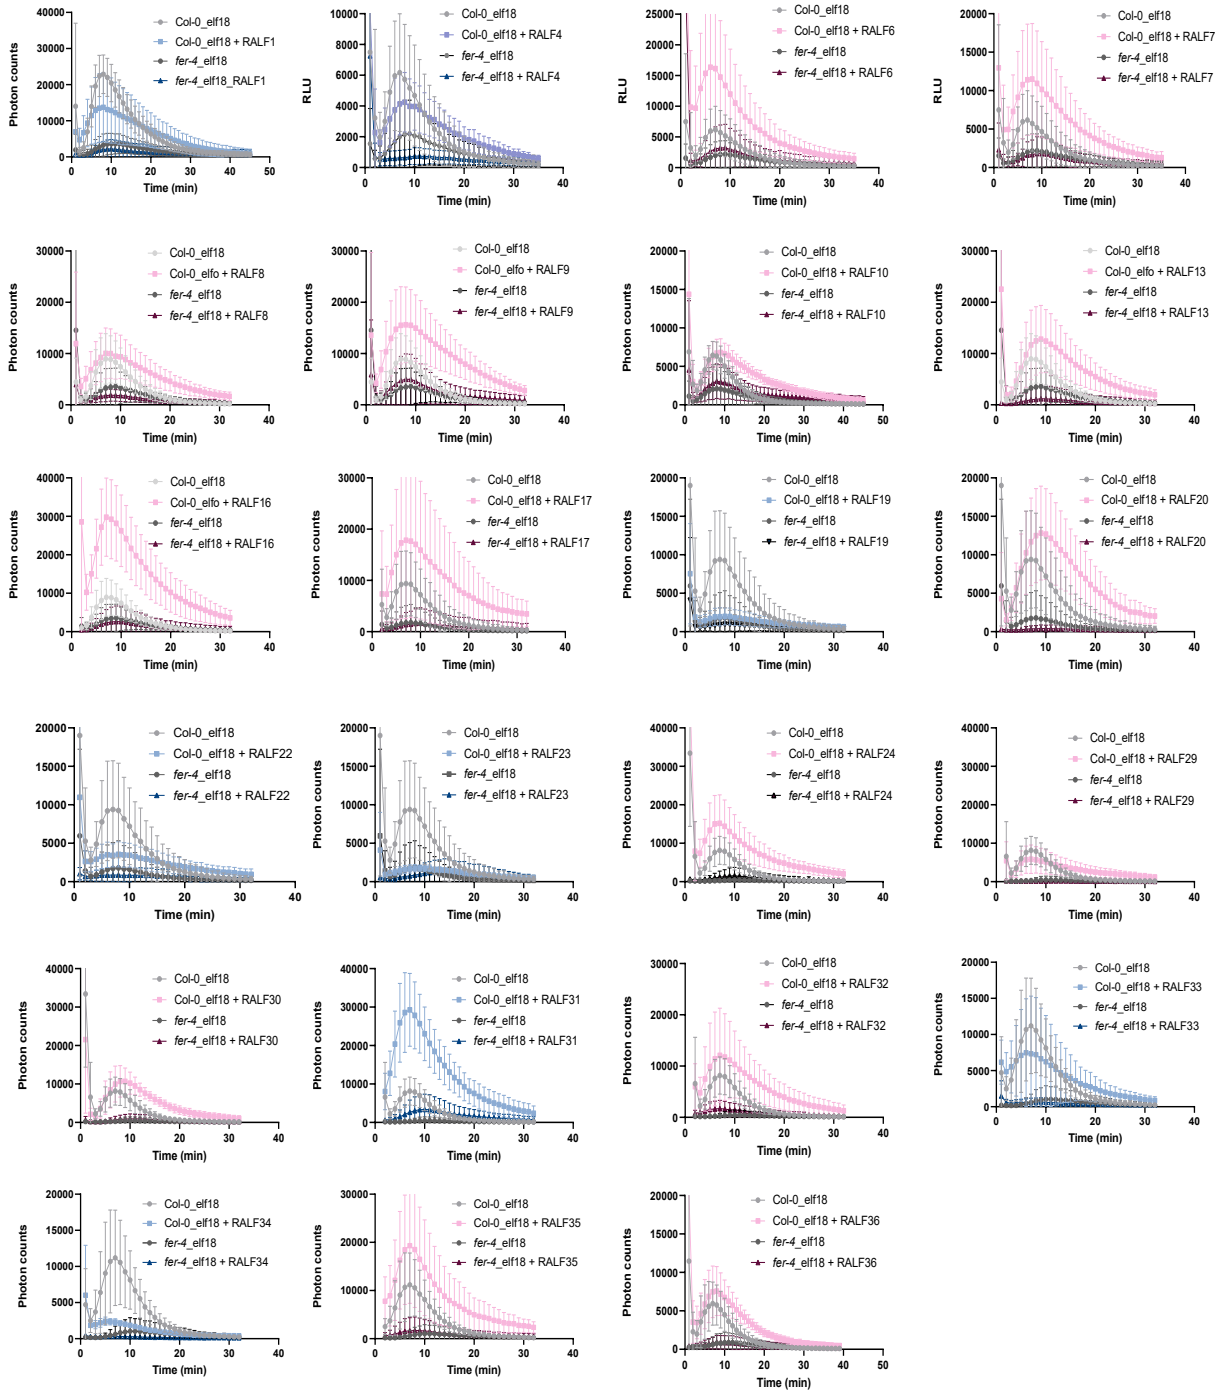

**Supplemental Figure S11. FER-dependency of *At*RALF peptide effects on elf18-induced ROS production.** ROS production in Col-0 and *fer-4* leaf discs co-treated with 100 nM elf18 and 1  $\mu$ M RALF peptides or elf18 alone as control. Shown are the kinetics of one representative replicate. Predicted S1P-cleaved RALF peptides are indicated in blue and non-cleaved in pink.

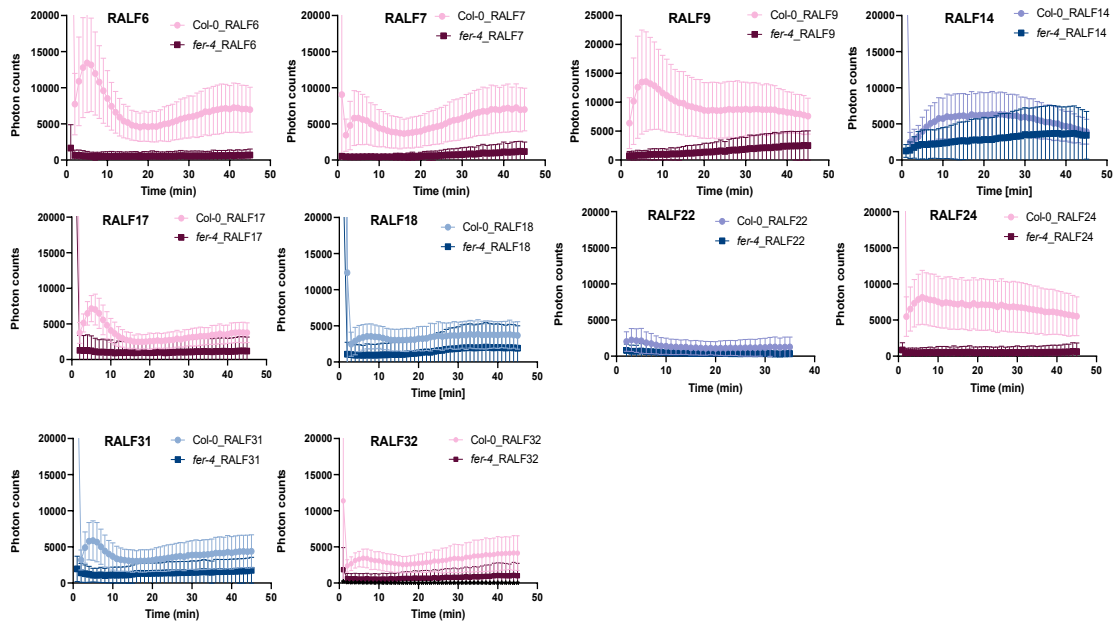

**Supplemental Figure S12. FER-dependency of *At*RALF peptide effects on ROS production.** ROS production in Col-0 and *fer-4* leaf discs treated with 1  $\mu$ M RALF peptides. Shown are the kinetics of one representative replicate. Predicted S1P-cleaved RALF peptides are indicated in blue and non-cleaved in pink.

**Supplemental Table S1. Re-annotation of *At*RALFs.** Literature comparison of the *At*RALF peptide annotation used in different publications (listed in chronological order) and databases. Pink rows indicate inconsistency in the annotation and the final column coloured in green shows our proposed consensus *At*RALF annotation.

| ATG number | TAIR   | Protein accession | Olsen et al.,2002 | Cao and Shi et al., 2012 | Haruta et al., 2014 | Morato do Canto et al., 2014 | Stegmann et al., 2017 | Campbell & Turner et al.,2017 | Consensus |
|------------|--------|-------------------|-------------------|--------------------------|---------------------|------------------------------|-----------------------|-------------------------------|-----------|
| AT1G02900  | RALF1  | Q9SRY3            | RALF1             | AT1G02900                | RALF1               | RALF1                        | RALF1                 | AT1G02900                     | RALF1     |
| AT1G23145  | RALF2  | A8MQ92            | RALF2             | AT1G23145                | RALF2               | RALF2                        | RALF2                 | AT1G23145                     | RALF2     |
| AT1G23147  | RALF3  | A7REE5            | RALF3             | AT1G23147                | RALF3               | RALF3                        | RALF3                 | AT1G23147                     | RALF3     |
| AT1G28270  | RALF4  | Q6TF26            | RALF4             | AT1G28270                | RALF4               | RALF4                        | RALF4                 | AT1G28270                     | RALF4     |
| AT1G35467  | RALF5  | A8MQI8            | RALF5             | AT1G35467                | RALF5               | RALF5                        | RALF5                 | AT1G35467                     | RALF5     |
| AT1G60625  | RALF6  | A8MQM2            | RALF6             | AT1G60625                | RALF6               | RALF6                        | RALF6                 | AT1G60625                     | RALF6     |
| AT1G60815  | RALF7  | A8MRD4            | RALF7             | AT1G60815                | RALF7               | RALF7                        | RALF7                 | AT1G60815                     | RALF7     |
| AT1G61563  | RALF8  | Q1ECR9            | RALF8             | AT1G61563                | RALF8               | RALF8                        | RALF8                 | AT1G61563                     | RALF8     |
| AT1G61566  | RALF9  | Q3ECL0            | RALF9             | AT1G61566                | RALF9               | RALF9                        | RALF9                 | AT1G61566                     | RALF9     |
| AT2G19020  | RALF10 | O65919            | RALF10            | AT2G19020                | RALF10              | RALF10                       | RALF10                | AT2G19020                     | RALF10    |
| AT2G19030  | RALF11 | O64466            | RALF11            | AT2G19030                | RALF11              | RALF11                       | RALF11                | AT2G19030                     | RALF11    |
| AT2G19040  | RALF12 | F4ISE1            | RALF12            | AT2G19040                | RALF12              | RALF12                       | RALF12                | AT2G19040                     | RALF12    |
| AT2G19045  | RALF13 | F4ISE2            | RALF13            | AT2G19045                | RALF13              | RALF13                       | RALF13                | AT2G19045                     | RALF13    |
| AT2G20660  | RALF14 | Q9SIU6            | RALF14            | AT2G20660                | RALF14              | RALF14                       | RALF14                | AT2G20660                     | RALF14    |
| AT2G22055  | RALF15 | A8MQM7            | RALF15            | AT2G22055                | RALF15              | RALF15                       | RALF15                | AT2G22055                     | RALF15    |
| AT2G32835  | RALF16 | A8MRM1            | RALF16            | AT2G32835                | RALF16              | RALF16                       | RALF16                | AT2G32835                     | RALF16    |
| AT2G32885  | RALF36 | A8MR00            | -                 | AT2G32885                | -                   | RALF17                       | RALF17                | AT2G32885                     | RALF17    |
| AT2G32890  | RALF17 | O48776            | RALF17            | -                        | RALF17              | -                            | -                     | AT2G32890                     | AT2G32890 |
| AT2G33130  | RALF18 | O49320            | RALF18            | AT2G33130                | RALF18              | RALF18                       | RALF18                | AT2G33130                     | RALF18    |
| AT2G33775  | RALF19 | Q6NME6            | RALF19            | AT2G33775                | RALF19              | RALF19                       | RALF19                | AT2G33775                     | RALF19    |
| AT2G34825  | RALF20 | A8MQL7            | RALF20            | AT2G34825                | RALF20              | RALF20                       | RALF20                | AT2G34825                     | RALF20    |
| AT3G04735  | RALF21 | A8MRF9            | RALF21            | AT3G04735                | RALF21              | RALF21                       | RALF21                | AT3G04735                     | RALF21    |
| AT3G05490  | RALF22 | Q9MA62            | RALF22            | AT3G05490                | RALF22              | RALF22                       | RALF22                | AT3G05490                     | RALF22    |
| AT3G16570  | RALF23 | Q9LUS7            | RALF23            | AT3G16570                | RALF23              | RALF23                       | RALF23                | AT3G16570                     | RALF23    |
| AT3G23805  | RALF24 | Q9LK37            | RALF24            | AT3G23805                | RALF24              | RALF24                       | RALF24                | AT3G23805                     | RALF24    |
| AT3G25165  | RALF25 | Q9LSG0            | RALF25            | AT3G25165                | RALF25              | RALF25                       | RALF25                | AT3G25165                     | RALF25    |
| AT3G25170  | RALF26 | Q0V822            | RALF26            | AT3G25170                | RALF26              | RALF26                       | RALF26                | AT3G25170                     | RALF26    |
| AT3G29780  | RALF27 | Q9LH43            | RALF27            | -                        | RALF27              | RALF27                       | RALF27                | AT3G29780                     | RALF27    |
| AT4G11510  | RALF28 | Q9LDU1            | RALF28            | AT4G11510                | RALF28              | RALF28                       | RALF28                | AT4G11510                     | RALF28    |
| AT4G11653  | RALF29 | A8MQP2            | RALF29            | AT4G11653                | RALF29              | RALF29                       | RALF29                | AT4G11653                     | RALF29    |
| AT4G13075  | RALF30 | A7REH2            | RALF30            | AT4G13075                | RALF30              | RALF30                       | RALF30                | AT4G13075                     | RALF30    |
| AT4G13950  | RALF31 | Q2HIM9            | RALF31            | AT4G13950                | RALF31              | RALF31                       | RALF31                | AT4G13950                     | RALF31    |
| AT4G14010  | RALF32 | O23262            | RALF32            | AT4G14010                | RALF32              | RALF32                       | RALF32                | AT4G14010                     | RALF32    |
| AT4G15800  | RALF33 | Q8L9P8            | RALF33            | AT4G15800                | RALF33              | RALF33                       | RALF33                | AT4G15800                     | RALF33    |
| AT5G67070  | RALF34 | Q9FHA6            | RALF34            | AT5G67070                | RALF34              | RALF34                       | RALF34                | AT5G67070                     | RALF34    |
| AT1G60913  | -      | A8MRK3            | -                 | -                        | -                   | RALF35                       | RALF35                | AT1G60913                     | RALF35    |
| AT4G14020  | -      | O23263            | -                 | AT4G14020                | RALF35              | -                            | -                     | AT4G14020                     | AT4G14020 |
| AT2G32785  | -      | A8MR74            | -                 | -                        | -                   | RALF36                       | RALF36                | -                             | RALF36    |
| AT2G32788  | -      | A8MRN0            | -                 | -                        | -                   | RALF37                       | RALF37                | -                             | RALF37    |

**Supplemental Table S2. Sequences of *Ai*RALF peptides synthesized.** Amino acid sequence of the synthesized RALF peptides.

| Peptide                | Sequence of synthesized RALF                                               |
|------------------------|----------------------------------------------------------------------------|
| RALF1                  | ATTKYISYQSLKRNSVPCSRRGASYYNQCNGAQANPYSRGCSKIARCRS                          |
| RALF2                  | AQKVIGYPAIGRDGARGCSPKDPSCPQQPEKPYKRGCEKITRCERDRRQAHLRNPRKVLDDVAVMAKAKQLY   |
| RALF3                  | GYPKQRFEGEDRTNPYEEITPPLIGGCDPKNPQTCLPKQPANPYRRGCLKITRCQRDV                 |
| RALF4                  | ARGRRYIGYDALKKNNVPCSRRGRSYYDCKKRRRNNPYRRGCSAITHCYRYAR                      |
| RALF5                  | AKRYIEYPPWQKHPCNPRFPTPDCYKRTPANPYRRGCTCISRCRRDCGGLSTWKKLLDTILKIPV          |
| RALF6                  | QTYINYNGMKGDIIPGCSKNPKECVKIPAYSYNRGCEISTRQCRRQHQHSSS                       |
| RALF7                  | IKQINYKDLIKDTIPGCTSKNPKECVKVPANTYHRGCEISTRCHREQHSSSG                       |
| RALF8                  | SVRYITYPAIDRGDHAHVHCDKAHPNTCKKKQANPYRRGCGVLEGCHRETGPKPT                    |
| RALF9                  | TRYITYPAIDRGDHAHVHCDKAHPNTCKKKEANPYQRGCEKINRCRGG                           |
| RALF10                 | VPVESRRKHLDYGVITKAGPNPPPGCYPPGAQQKNPTPANERYRRGCSKITRCKRD                   |
| RALF13                 | EPVESRNYIEYGAINKCAGPNPPPGCNPPEAEQKNPNVNEYSRGCSKIHRCCR                      |
| RALF14                 | QASRYISYEALKKNLDPNRRGEPDQRDNPYRRSCDVHSHCYRFTN                              |
| RALF15                 | TRYISYRGMNHGDHAIHCDKAHPNTCKKQVANPYRRGCGTIERCRRDTGRK                        |
| RALF16                 | RTLGYGSIKGDRIACGYKNPNSCVKQPVNHYHRGCEKITRCARDAARYTESFNVDDESPIINLH           |
| RALF17                 | NSIGAPAMREDLPKGCAPGSSAGCKMQPANPYKPGCEASQRCRGG                              |
| RALF18                 | AKRFIDYEALKKNLPAKPDGKPKDPDNKYRRGCSAATGCYRFTN                               |
| RALF19                 | AARRSYISYGALRKNNVPCSRRGRSYYDCKKRRKRPANPYRRGCSVITHCYRQTS                    |
| RALF20                 | AKTIGNPAMREDEPKGCPPGSPASCKMQPANPYKPGCEASQRCRGT                             |
| RALF21                 | KVIGYPGLKPDLPDCHHRYPSACAPSEQPVNPYRRGCSKIHRCCRDSPPAPISRKMLIRGQLIYNAYNAYIQYP |
| RALF22                 | AQKKYISYGAMRRNSVPCSRRGASYYNQCNGAQANPYSRGCSITRCCR                           |
| RALF23                 | ATRRYISYGALRRNTIPCSRRGASYYNCRGAQANPYSRGCSAITRCCR                           |
| RALF24                 | MMRKQYISYETLRRDMVPCQKPGASYACRSGQANAYNRGCSVITRCARDTNDIKT                    |
| RALF25                 | NDNKRKYLDDPCLRPNAPPGCHRQPYKPRTPVNVYSRGCTTINRCRRVQNP                        |
| RALF26                 | KYLNPGVLDRCRGNPPAGCHPHNSHHKPRVPVHNYSRGCSRITRCCRDA                          |
| RALF27                 | SYKTLQKQPTCDGRIAGNCIGTVNPKGATCTYYQRCKRAA                                   |
| RALF28                 | NEIGYPMGRGDRQPGCDHGNCPPDQANPYHRGCEKSKRCRGPDPALPRKMI                        |
| RALF29                 | AKRYIEYPIRLDLGKGCDFRFTAACYKRTPANPYRRPCTTANRCRRSTSSTRVPSLKTFFVEIPPM         |
| RALF30                 | AGGGKFLNPGVLDPCLRPNPPPEQAPGSAGKPRERVNEYKVGCSKLTRCDRVG                      |
| RALF31                 | MAQKRYIGYETLRRDMVPCQKPGASYDCRSGQANSYSRGCDTITRCARDTNDINT                    |
| RALF32                 | QAHKLSYGALRRNQACDGGKRGESYSTQCLPPPSNPYSRGCSKHYRCGRDS                        |
| RALF33                 | ATTKYISYGALRRNTVPCSRRGASYYNCRGAQANPYSRGCSAITRCCR                           |
| RALF34                 | YWRRTKYYISYGALSANRVPCPPRSGRSYYTHNCFRARGPVHPYSRGCSITRCCR                    |
| AT2G32890              | GAAADVSRGGCGGGDGLDNERCVAVKEDDDDDVDDVYKVINMRIA                              |
| RALF1 <sub>ccc</sub>   | ATTKYISYQSLKRNSVPASRRGASYYNQAQNGAQANPYSRGASKIARARS                         |
| RALF1 <sub>113A</sub>  | ATTKYASYQSLKRNSVPCSRRGASYYNQCNGAQANPYSRGCSKIARCRS                          |
| RALF23 <sub>ccc</sub>  | ATRRYISYGALRRNTIPASRRGASYYNARRGAQANPYSRGASAITRARRS                         |
| RALF23 <sub>113A</sub> | ATRRYASYGALRRNTIPCSRRGASYYNCRGAQANPYSRGCSAITRCCR                           |

**Supplemental Table S3. Accession numbers of the proteins used in this study.**

| Protein name | Accession number |
|--------------|------------------|
| RALF1        | AT1G02900        |
| RALF2        | AT1G23145        |
| RALF3        | AT1G23147        |
| RALF4        | AT1G28270        |
| RALF5        | AT1G35467        |
| RALF6        | AT1G60625        |
| RALF7        | AT1G60815        |
| RALF8        | AT1G61563        |
| RALF9        | AT1G61566        |
| RALF10       | AT2G19020        |
| RALF13       | AT2G19045        |
| RALF14       | AT2G20660        |
| RALF15       | AT2G22055        |
| RALF16       | AT2G32835        |
| RALF17       | AT2G32885        |
| RALF18       | AT2G33130        |
| RALF19       | AT2G33775        |
| RALF20       | At2g34825        |
| RALF21       | At3g04735        |
| RALF22       | At3g05490        |
| RALF23       | At3g16570        |
| RALF24       | At3g23805        |
| RALF25       | At3g25165        |
| RALF26       | At3g25170        |
| RALF27       | At3g29780        |
| RALF28       | At4g11510        |
| RALF29       | At4g11653        |
| RALF30       | At4g13075        |
| RALF31       | At4g13950        |
| RALF32       | At4g14010        |
| RALF33       | At4g15800        |
| RALF34       | At5g67070        |
| RALF35       | AT1G60913        |
| RALF36       | AT2G32785        |
| FERONIA      | AT3G51550        |
| LLG1         | AT5G56170        |
